# Supplementary material
Source: publisher site journal article supplement (https://www.dovepress.com/article/493675)
Supplement: Supplementary file 1 [file get_supplementary_file.php]

**Supplementary materials**

**Supplementary Figure 1 scRNA-seq Data QC and Removal of Mitochondrial Genes**


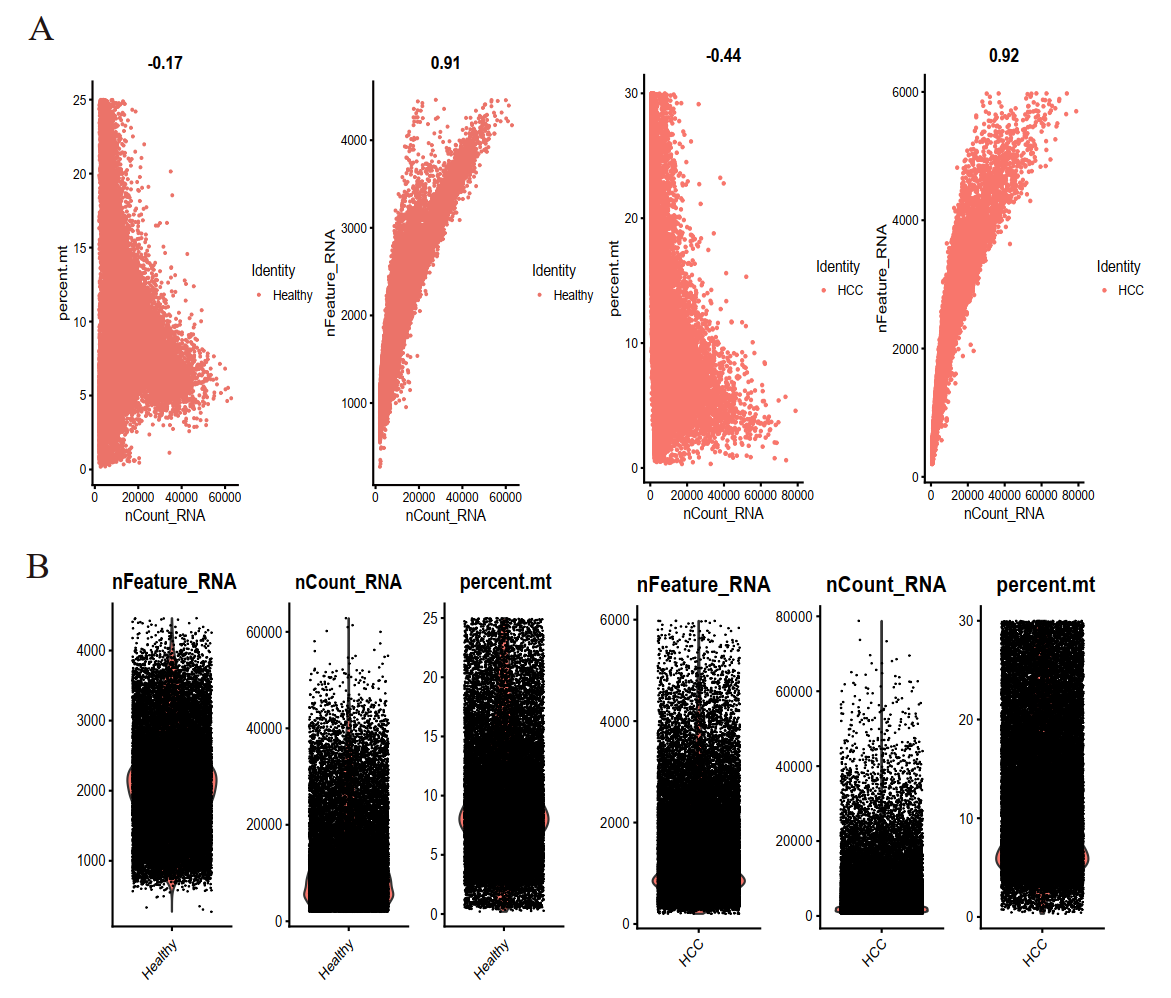


(A-B) Filtering criteria for cells based on unique feature counts and mitochondrial percentages, resulting in 48176 cells for analysis from two datasets (GSE158723 and GSE112271).
